## Increased Serum Levels of Advanced Glycation End Products in NIDDM Patients With Diabetic Complications

Advanced glycation end products (AGEs) are produced by a nonenzymatic reaction between proteins and sugar in patients with long-term hyperglycemia (1). AGEs accumulate with time and are irreversibly deposited in various tissues of the body, contributing to the development of diabetic complications, arteriosclerosis, and aging (1–3).

The results of the Diabetes Control and Complications Trial have shown that long-term hyperglycemia is the cause of various diabetic complications. However, the mechanisms responsible for development of these complications arising from persistent hyperglycemia have not yet been elucidated. The idea that AGEs are the ultimate causative factor of diabetic complications is highly convincing.

Histopathological studies using an anti-AGE antibody have suggested that AGEs play an important role in the development of nephropathy in diabetic animals and patients, as seen, for example, in AGE accumulation on the basement membrane in streptozocin rats (4) and AGE staining in nodular lesions of diabetic patients with nephropathy (5). In addition, an injection of the AGE-modified albumin into normal rats was reported to induce glomerulosclerosis, as manifested by basement membrane widening and an increase in mesangial extracellular matrix (6). In an *in vitro* investigation, exposure of mesangial cells to AGEs promoted the production of matrix protein (7). These findings strongly suggest that AGEs are associated with nephropathy.

We determined serum AGE levels in patients with NIDDM and evaluated the relationship between these levels and diabetic complications. A total of 125 patients (mean age  $59.2 \pm 11.1$  years, duration of diabetes  $11.6 \pm 8.9$  years, mean  $HbA_{1c}$   $6.8 \pm 1.0\%$ ) and 63 healthy volunteers were studied. Serum AGEs were measured by a newly developed enzyme-linked immunosorbent assay method using anti-AGE keyhole limpet hemocyanin.

Serum AGE levels were significantly higher in the diabetic group compared

with the normal control group ( $7.2 \pm 14.6$  vs.  $3.3 \pm 1.0$  mU/ml,  $P < 0.05$ ). Significant correlations were seen between serum AGEs and the degree of diabetic nephropathy. Serum AGE levels of diabetic patients with proliferative retinopathy were significantly higher than those of patients without retinopathy ( $P < 0.05$ ).

Serum AGE levels reflected the severity of diabetic complications, including nephropathy and retinopathy; therefore, this method may prove to be a very useful tool for patient evaluation and follow-up, as well as for monitoring the effects of treatment in clinical practice.

YURI ONO, MD  
SHIN AOKI, MD

KATSUNORI OHNISHI, MD  
TAKUZI YASUDA, MD  
KATSUMI KAWANO, PHD  
YUTAKA TSUKADA, MD

From the Department of Internal Medicine (Y.O., S.A., K.O., T.Y.), Sapporo Shakaihoken General Hospital, Sapporo; and the Special Reference Laboratories (K.K., Y.T.), Tokyo, Japan.

Address correspondence to Yuri Ono, Department of Internal Medicine, Sapporo Shakaihoken General Hospital, 2-6 Chuou, Atsubetsu, Atsubetsu-Ku, Sapporo 004, Japan. E-mail: yuriono@ja2.so-net.or.jp.

### References

1. Brownlee M, Cerami A, Vlassara H: Advanced glycosylation end products in tissue and the biochemical basis of diabetic complication. *N Engl J Med* 318:1315–1321, 1988
2. Monnier VM: Nonenzymatic glycosylation, the Maillard reaction and the aging process. *J Gerontol* 45:B105–B111, 1990
3. Miyata S, Monnier VM: Immunohistochemical detection of advanced glycosylation end products in diabetic tissue using monoclonal antibody to pyrraline. *J Clin Invest* 89:1102–1112, 1992
4. Nicholls K, Mandel TE: Advanced glycosylation end-products in experimental murine diabetic nephropathy. *Lab Invest* 60:486–491, 1989
5. Makino H, Shikata K, Hironaka K, Kushiro M, Yamasaki Y, Sugimoto H, Ota Z, Araki N, Horiuchi S: Ultrastructure of nonenzymatically glycosylated mesangial matrix in diabetic nephropathy. *Kidney Int* 48:517–526, 1995
6. Vlassara H, Striker LJ, Teichberg S, Fuh H, Ming Li Y, Steffes M: Advanced glycation end products induce glomerular sclerosis and albuminuria in normal rats. *Proc Natl Acad Sci USA* 91:11704–11708, 1994
7. Doi T, Vlassara H, Kirstein M, Yamada Y, Striker GE, Striker LJ: Receptor-specific

increase in extracellular matrix production in mouse mesangial cells by advanced glycosylated end products is mediated via platelet-derived growth factor. *Proc Natl Acad Sci USA* 89:2873–2877, 1992

## Making Things Easier Is Not So Easy

The 1997 American Diabetes Association criteria and glucose intolerance

The 1997 American Diabetes Association (ADA) diagnostic criteria for diabetes were recently compared with the criteria proposed by the World Health Organization (WHO) by applying the data from the Third National Health and Nutrition Examination Survey. Harris et al. (1) conclude that although the number of people with undiagnosed diabetes was lower when the new ADA fasting criteria were used, their extended use may result in the detection of a greater number of people with undiagnosed diabetes in clinical practice because of the simplicity and greater use of a fasting plasma glucose value versus the glucose tolerance test.

Other conclusions obtained from their results need to be emphasized. First, a poor concordance (38%) was observed between the ADA “impaired fasting glucose” category and the WHO “impaired glucose tolerance” status. In fact, 18% of the subjects with ADA impaired fasting glucose were diabetic according to the WHO criteria, and 43% had a normal glucose tolerance. These data suggest that the 2-h postchallenge plasma glucose is a complementary test needed to be done in these subjects to avoid under- or overcategorization of the cases. Second, 70% of the WHO impaired glucose tolerance cases were considered normal using the ADA criteria. These data suggest that the main purpose of the new criteria, an earlier diagnosis of diabetes and glucose intolerance (2), will not be achieved without complementary actions. Clearly, in a subset of the subjects (fasting plasma glucose  $< 126$  mg/dl), the information obtained from the fasting plasma glucose is not the same as that obtained by the 2-h postchallenge plasma glucose. We cannot leave without a proper diagnosis a large number (10.5 million according to Harris) of the glucose-intolerant subjects, knowing that they have increased cardiovascular

morbidity and a greater risk for developing diabetes (3,4). The merit of a simple test as a diagnostic tool cannot be disputed; however, some of its usefulness is lost when it is not followed by the proper use of complementary tests. A selective testing using a 2-h postchallenge plasma glucose in high-risk individuals (as defined by the Expert Committee) would be a better alternative in this subset of the population. In the U.S., according to the data from Harris et al., the vast majority of the 2.1 million cases currently unidentified as diabetic by the ADA criteria could be properly diagnosed using this approach.

In conclusion, we believe that the data reported by Harris et al. give a nice demonstration that the fasting plasma glucose and the 2-h postchallenge plasma glucose are complementary tests for diagnosing diabetes in subjects in whom a fasting plasma glucose <126 mg/dl is found.

CARLOS ALBERTO AGUILAR-SALINAS, MD  
 EDUARDO GARCÍA-GARCÍA, MD  
 ISRAEL LERMAN-GARBER, MD  
 FRANCISCO J. GÓMEZ PÉREZ, MD  
 JUAN A. RULL, MD

From the Departamento de Diabetes y Metabolismo de Lípidos, Instituto Nacional de la Nutrición, Mexico City, Mexico.

Address correspondence to Carlos Alberto Aguilar-Salinas, MD, Vasco de Quiroga 15, Mexico City 14000, Mexico. E-mail: caas@aztlan.innsz.mx.

References

1. Harris MI, Eastman RC, Cowie CC, Flegal KM, Eberhardt MS: Comparison of diabetes diagnostic categories in the U.S. population according to the 1997 American Diabetes Association and 1980–1985 World Health organization diagnostic criteria. *Diabetes Care* 20:1859–1862, 1997
2. The Expert Committee on the Diagnosis and Classification of Diabetes Mellitus: Report of the Expert Committee on the Diagnosis and Classification of Diabetes Mellitus. *Diabetes Care* 20:1183–1197, 1997
3. Jarrett RJ, Shipley MJ: Type 2 (non insulin dependent) diabetes mellitus and cardiovascular disease: putative association via common antecedents: further evidence from the Whitehall Study. *Diabetologia* 31:737–740, 1988
4. Rios JM, Gomez R, Roman V, Villa A, Perez EB, Gomez-Perez F, Rull JA: High rate of progression of impaired glucose tolerance (IGT) to diabetes (DM) in a genetically susceptible population (Abstract). *Diabetes* 44 (Suppl. 1):184A, 1995

## Hyperhomocysteinemia and Microalbuminuria in Diabetes

We read with interest the study by Hofmann et al. (1) on hyperhomocysteinemia [HH(e)] and endothelial dysfunction in patients with IDDM, and the accompanying editorial by Dr. Colwell (2). These data are compatible with previous observations that patients with IDDM without microalbuminuria or vascular disease have normal homocysteine [H(e)] metabolism (3,4). In contrast, patients with NIDDM without microalbuminuria have an increased prevalence of postload HH(e) with normal fasting plasma H(e) concentrations (4). In this context, it may be relevant that insulin plays a role in amino acid metabolism and acute hyperinsulinemia during a hyperinsulinemic-euglycemic clamp lowers plasma H(e) concentrations in normal subjects but not in insulin-resistant patients with NIDDM (5).

Dr. Colwell suggests that the HH(e) in patients with IDDM and microalbuminuria may be due to preexisting endothelial function. However, the pattern of HH(e) with both fasting and postload elevations in H(e) suggests another possible explanation. Plasma H(e) concentrations are determined by the activity of several enzymes, the two most important of which are methylene tetrahydrofolate reductase (MTHFR) and cystathionine-β-synthase. The kidney plays a pivotal role in maintaining normal plasma H(e) (6). The enzyme MTHFR is highly expressed and active in the kidney, and its dysfunction leads to HH(e) in patients with renal impairment. Decreased activity of this enzyme leads to elevated fasting plasma H(e), as in the patients of Hofmann et al. Thus, it is possible that even in the early stage of microalbuminuria, the function of this enzyme in the kidney is impaired, leading to HH(e).

Hofmann et al. suggest that HH(e) causes endothelial dysfunction by induction of oxidative stress. However, it is well recognized that diabetes itself leads to oxidative stress. We have recently established that in the presence of vascular disease, plasma concentrations of thiobarbituric acid-reactive substances (a marker of oxidative stress) are elevated in diabetic patients with vascular disease and that no further elevation occurs in the presence of

coexistent HH(e) (7).

HH(e) is well established as a risk factor for macrovascular disease (8). Further investigation is required into the mechanisms of HH(e) in patients with diabetes and its role in the progression of microvascular and macrovascular disease in these patients.

VIVIAN A. FONSECA, MD  
 TAMMY REYNOLDS, BSMT  
 LOUIS M. FINK, MD

From the Division of Endocrinology (V.A.F.), Department of Medicine; and the Department of Pathology (T.R., L.M.F.), University of Arkansas for Medical Sciences and John L. McClellan Memorial Veterans' Hospital, Little Rock, Arkansas.

Address correspondence to Vivian A. Fonseca, Division of Endocrinology, Department of Medicine, University of Arkansas for Medical Sciences, VA Hospital (111J), 4300 W. 7th St., Little Rock, AR 72205.

References

1. Hofmann MA, Kohl B, Zumbach MS, Borcea V, Bierhaus A, Henkels M, Amiral J, Fiehn W, Ziegler R, Wahl P, Nawroth PP: Hyperhomocyst(e)inemia and endothelial dysfunction in IDDM. *Diabetes Care* 20:1880–1886, 1997 (The version of this paper cited here was withdrawn. A revised version was printed in *Diabetes Care* 21:841–848, 1998.)
2. Colwell JA: Elevated plasma homocysteine and diabetic vascular disease. *Diabetes Care* 20:1805–1806, 1997
3. Robillon JF, Canivet B, Candito M, Sadoul JL, Jullien D, Morand P, Chambon P, Freychet P: Type 1 diabetes mellitus and homocyst(e)ine. *Diabete Metab* 20:494–496, 1994
4. Munshi M, Stone A, Fink L, Fonseca V: Hyperhomocysteinemia following a methionine load in non-insulin dependent diabetes and macrovascular disease. *Metabolism* 45:133–135, 1996
5. Fonseca VA, Mudaliar S, Schmidt B, Fink LM, Kern PA, Henry RR: Plasma homocysteine concentrations are regulated by acute hyperinsulinemia in diabetic but not type II diabetic subjects. *Metabolism*. In press
6. Bostom AG, Brosnan JT, Hall B, Nadeau MR, Selhub J: Net uptake of plasma homocysteine by the rat kidney in vivo. *Atherosclerosis* 116:59–62, 1995
7. Fonseca VA, Stone A, Munshi M, Baliga BS, Aljada A, Thusu K, Fink L, Dandona P: Oxidative stress in diabetes mellitus: does homocysteine have a role? *South Med J* 90:903–906, 1997
8. Guba S, Fonseca V, Fink L: Hyperhomocysteinemia: the emerging and important risk factor for cardiovascular disease. *Am J Clin Pathol* 106:709–722, 1996
